# Supplementary material
Source: PubMed Central journal article supplement (PMC1885576)
Supplement: pnas_0701453104_3.pdf [file pnas_0701453104_3.pdf]

**Table 3. Data collection and refinement statistics**

|                                            | PGRP-IβC     | PGRP-IβC–GMPP   |
|--------------------------------------------|--------------|-----------------|
| Space group                                | $P2_12_12$   | $P2_1$          |
| Unit cell dimensions                       |              |                 |
| <i>a</i> (Å)                               | 127.4        | 40.9            |
| <i>b</i> (Å)                               | 56.8         | 60.9            |
| <i>c</i> (Å)                               | 36.8         | 97.0            |
| β (°)                                      |              | 96.5            |
| Resolution (Å)                             | 30–2.2       | 30–2.1          |
| Observations                               | 215,322      | 272,478         |
| Unique reflections                         | 12369 (704)* | 27,838 (1,328)* |
| Completeness (%)                           | 91.7 (71.5)  | 97.9 (96.7)     |
| $R_{\text{merge}}$ (%)                     | 8.9 (33.7)   | 6.4 (27.3)      |
| $R_{\text{cryst}}$ (%)                     | 22.9 (31.6)  | 21.0 (30.7)     |
| $R_{\text{free}}$ (%)                      | 28.5 (36.4)  | 24.2 (34.1)     |
| Molecules per asymmetric unit              | 2            | 3               |
| Protein residues                           | 328          | 502             |
| No. of Ni <sup>2+</sup> atoms              | 5            |                 |
| No. of water molecules                     | 135          | 325             |
| Average <i>B</i> factors (Å <sup>2</sup> ) |              |                 |
| Protein                                    | 23.2         | 29.6            |
| GMPP                                       |              | 38.4            |
| Waters                                     | 31.4         | 40.1            |
| r.m.s. deviations                          |              |                 |
| Bonds (Å)                                  | 0.019        | 0.025           |
| Angles (°)                                 | 1.97         | 2.37            |
| Ramachandran plot statistics               |              |                 |
| Core (%)                                   | 88.0         | 91.2            |
| Allowed (%)                                | 11.7         | 8.8             |
| Generous (%)                               | 0.3          | 0               |
| Disallowed (%)                             | 0            | 0               |

$R_{\text{merge}}(I) = (\sum |I(i) - \langle I(h) \rangle| / \sum I(i))$ , where  $I(i)$  is the  $i$ th observation of the intensity of the  $hkl$  measurements of the  $hkl$  reflection.  $R_{\text{cryst}}(F) = \sum_h ||F_{\text{obs}}(h)| - |F_{\text{calc}}(h)|| / \sum_h |F_{\text{obs}}(h)|$  and  $|F_{\text{calc}}(h)|$  are the observed and calculated structure factor amplitudes for the  $hkl$  reflection.  $R_{\text{free}}$  is calculated over reflections in a test set not included in atomic refinement: PGRP-IβC, 654 reflections, 5.0%; PGRP-IβC–GMPP, 670 reflections, 5.1%.

\*Values in parentheses correspond to the highest resolution shell: PGRP-IβC (2.3–2.2 Å); PGRP-IβC–GMPP (2.2–2.1 Å).
