# Supplementary material
Source: PubMed Central journal article supplement (PMC1885576)
Supplement: pnas_0701453104_4.pdf [file pnas_0701453104_4.pdf]

**Table 4. Hydrogen bond interactions in the PGRP-I $\beta$ C–GMPP and PGRP-I $\alpha$ C–MPP complexes**

| Atoms of GMPP or MPP |                | Atoms of PGRP-I $\beta$ C |                              | Atoms of PGRP-I $\alpha$ C |                |
|----------------------|----------------|---------------------------|------------------------------|----------------------------|----------------|
| NAG                  | O4             | R353                      | N $\eta$ 1                   |                            |                |
|                      | O5             | <i>T354*</i>              | <i>O<math>\gamma</math>1</i> |                            |                |
|                      | O7             | T354                      | O $\gamma$ 1                 |                            |                |
| NAM                  | N2             | T241                      | O                            | T209                       | O              |
|                      | O1             |                           |                              | T209                       | O              |
|                      | O3             | <i>T354*</i>              | <i>O<math>\gamma</math>1</i> |                            |                |
|                      | O4             | <i>T354*</i>              | <i>O<math>\gamma</math>1</i> |                            |                |
|                      | O7             |                           |                              | H231                       | N $\epsilon$ 2 |
|                      | O10            | Y263                      | O $\eta$                     |                            |                |
| ALA1                 | O10            | Y274                      | O $\eta$                     | Y242                       | O $\eta$       |
|                      | O              |                           |                              | R235                       | N $\eta$ 2     |
|                      | O              | <i>R353*</i>              | <i>O</i>                     |                            |                |
| GDG                  | O $\epsilon$ 1 | D301                      | O $\delta$ 1                 | N269                       | N $\delta$ 2   |
|                      | N              | S296                      | O                            | H264                       | O              |
|                      | O              | S296                      | O                            | Y266                       | O              |
|                      | O2             | <i>R353*</i>              | O                            |                            |                |
| LYS                  | N $\zeta$      | <i>K268*</i>              | O                            | N236                       | O              |
| ALA4                 | O              |                           |                              | G267                       | N              |
|                      | O              |                           |                              | N269                       | N $\delta$ 2   |
|                      | O              |                           |                              | <i>N269*</i>               | <i>N</i>       |
| ALA5                 | OXT            | Q293                      | N $\epsilon$ 2               |                            |                |
|                      | OXT            | D302                      | N                            |                            |                |
|                      | OXT            | <i>G262*</i>              | O                            |                            |                |

Alanines at GMPP or MPP positions 1, 4, and 5 are designated ALA1, ALA4, and ALA5. NAG, *N*-acetylglucosidic acid (in GMPP only); NAM, *N*-acetylmuramic acid; GDG,  $\gamma$ -D-glutamate (in GMPP) or  $\gamma$ -D-glutamine (in MPP). O2 is the carboxyl O atom of GDG.

\*Water-mediated hydrogen bonds are in italics.
