# Supplementary material
Source: PubMed Central journal article supplement (PMC1885576)

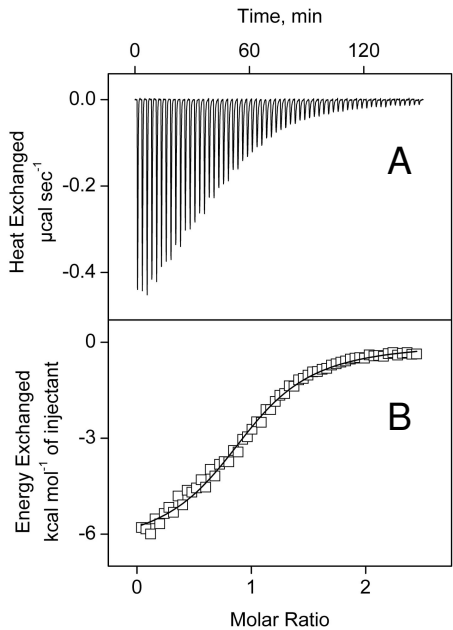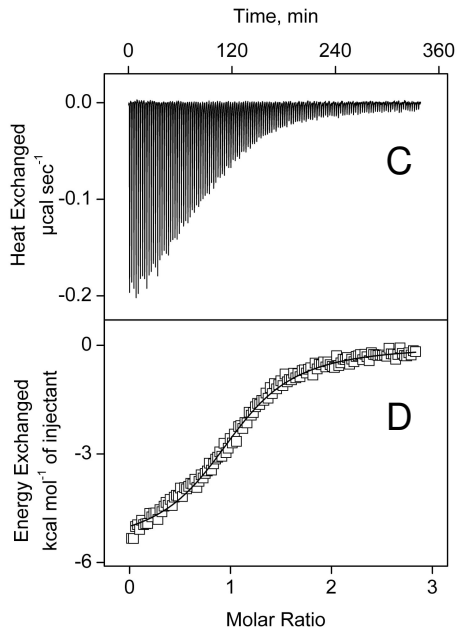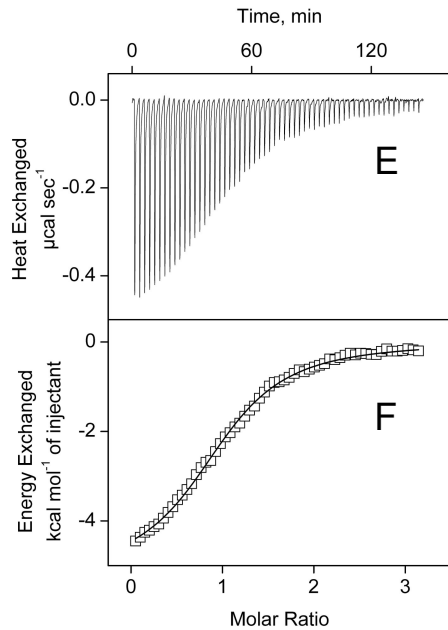

Supplement: pnas_0701453104_1.pdf [file pnas_0701453104_1.pdf]

**A**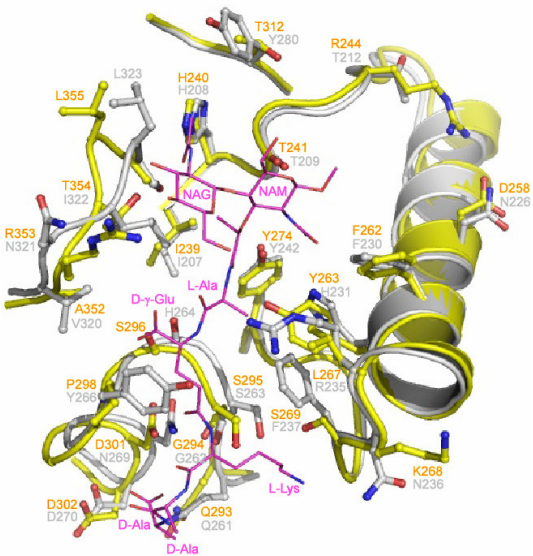**B**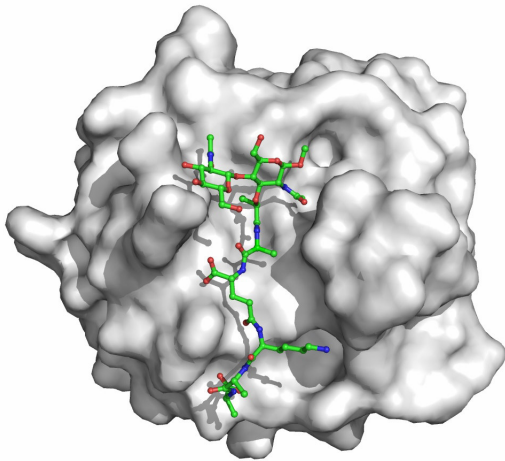**C**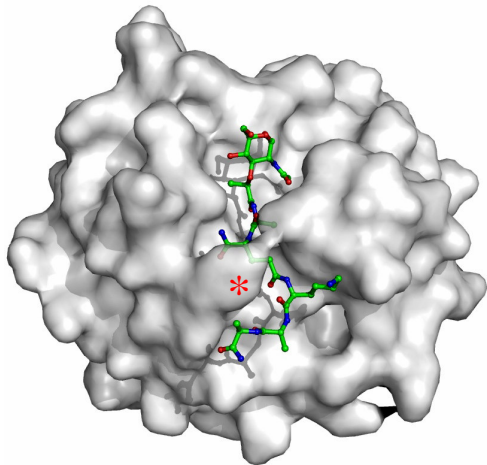

Supplement: pnas_0701453104_2.pdf [file pnas_0701453104_2.pdf]
